# Supplementary material
Source: HighWire-hosted journal article supplement (https://bmjopenquality.bmj.com/highwire/filestream/136092/field_highwire_adjunct_files/2/ds2017.xls)
Supplement: ds2017.xls [file ds2017.xls]

## Sheet: May 1st
Ward	Medication on Admission	Medication Changes	Medication Loading Doses Administered	Medication on Discharge	0=no change, 1=change not documented, 2=changed & documented, 3=changed, doc, reasons, n/a = can't tell, no = no medication
FALCON WARD Fielding	Amoxicillin liquid 500mg PO TDS Humilin M3 20 units SC OM Solifenacin 10mg PO OM Aspirin 75mg PO OM Furosemide 40mg PO OM Clonazepam 500 micrograms PO ON Donepezil 5mg PO ON Macrogol 2 sachets PO BD Simvastatin 20mg PO ON Gliclazide 40mg PO PRN (if blood sugar >12 pre-dinner)	Amoxicillin changed to co-amoxiclav Gliclazide changed to Actrapid Added: Glucagon 1mg IM PRN if blood sugar <4 Hypostop 2 sachets BUCCAL PRN if blood sugar <4 Paracetamol 1 gram PO QDS PRN		- Humilin M3 20 units SC OM - Solifenacin 10mg PO OM - Aspirin 75mg PO OM - Furosemide 40mg PO OM - Clonazepam 500 micrograms PO ON - Donepezil 5mg PO ON - Macrogol 2 sachets PO BD - Simvastatin 20mg PO ON Paracetamol 1 gram PO QDS PRN	2
Maple	Folic Acid 5mg PO OD Vitamin D3 1000 units PO OD	Nil	Course of Nitorfurantoin for UTI	Paracetamol 1g PO QDS (PRN) Folic Acid 5mg od Fortisip compact, T, PO OD Vitamin D3, 800 units, PO OD	1
Heron	Patient has dosette box filled in by Boots Pharmacy , Sunbury , Tel :01932787493, fax : 01932780057. Sunbury Cross Centre, Staines Road, Sunbury, TW16 7AZ Mirtazapine 45mg po ON Alendronic Acid 70mg po once a week (Mondays) Adcal D3 T po BD Amlodipine 5mg po OD Aspirin 75mg po od Citalopram 20mg po OM Metformin 500mg po BD Atorvastatin 20mg ON Paracetamol 1g up to QDS PRN	no antibiotics to go home with. MP		Patient has dosette box filled in by Boots Pharmacy , Sunbury , Tel :01932787493, fax : 01932780057. Sunbury Cross Centre, Staines Road, Sunbury, TW16 7AZ - please call to arrange delivery on d/c Mirtazapine 45mg po ON Alendronic Acid 70mg po once a week (Mondays) Adcal D3 T po BD Amlodipine 5mg po OD Aspirin EC 75mg po od Citalopram 20mg po OM Metformin 500mg po BD Atorvastatin 20mg ON Paracetam…	1
MAPLE WARD	Atorvastatin 80mg PO ON Bisoprolol 1.25mg PO OM Clopidogrel 75mg PO OM Ramipril 1.25mg PO OD Furosemide 40mg OM and lunch Eplerenone 25mg OM Aspirin 75mg OM Lansoprazole 15mg OM	Frusemide dose reduced Sodium docusate and macrogol started paracetamol started gaviscon started levobunolol started Ramipril stopped due to persistant low BP		To be put into a dossette box by Herman Pharmacy, 7 Trident House, Clare Road, Stanwell, TW19 7QU and delivered on 22/4/13: Atorvastatin 80mg PO ON Bisoprolol 1.25mg PO OM Clopidogrel 75mg PO OM Eplerenone 25mg PO OM Aspirin 75mg PO OM Lansoprazole 15mg PO lunch time Sodium docusate 100mg PO BD Frusemide 20mg PO OM and 12.00 To be supplied by St. Peters Hospital Pharmacy: Macrogol T PO BD Levobun…	2
HOLLY WARD Wordsworth ward- Asford Hospital.	Ramirpil 10mg OD Doxazosin 4mg OD Oramorph 10-20mg QDS PRN Lansoprazole 30mg OD Fentanyl patch 100micrograms every 72hours (Durogesic)	Ramipril reduced to 5 mg od Doxazosin stopped		Ramipril 5mg OD Oramorph 10-20mg QDS PRN Lansoprazole 30mg OD Fentanyl patch (one hundred) 100micrograms/hr Topically every 72hours. Provide (four) 4 patch only.(Durogesic) Nitrofurantoin 100mg BD (for 3 days) Paracetamol 1 g po qds Fortisip compact 1 bottle bd	1
SWAN - ORTHO	levothyroxine 50mcg pantoprazole 40mg diazepam 5mg prn ferrous fumarate 322mg bd betagan eye drops rt eye OD ibuprofen gel 5% prn salbutamol 2puffs QDS CFC free 100micrograms/puff calcium carbonate + colecalciferol	started spirvia		Co-amoxiclav 625mg TDS PO upto and including the 1/5/13 paracetamol 1g po qds levothyroxine 50mcg OM pantoprazole 40mg ON ferrous sulphate 200mg bd Levobunol 0.5% eye drops. 1 drop in both eyes. Top OD. adcal d3 T bd alendronic acid 70mg po once weekly on sundays Fortisip T TDS Salbutamol 100–200 micrograms (1–2 puffs) QDS Spirvia 18microgram T OD INH Macrogol TT BD Senna T BD	1
Maple Ward	Amoxicillin 500 mg tds Aspirin 75 mg od Adcal D3 one tablet bd Omeprazole 20 mg od Ramipril 5 mg od Levetiracetam 500 mg bd Strontium 2 g on Tramadol 100 mg qds Lactulose 10 ml bd Paracetamol 1 g qds Ibuprofen gel	Completed course of antibiotics Started amlodipine		Aspirin 75 mg od Adcal D3 one tablet bd Omeprazole 20 mg od Ramipril 5 mg od Levetiracetam 500 mg bd Strontium 2 g on Lactulose 10 ml bd Paracetamol 1 g qds Ibuprofen gel 5% topically to knee Amlodipine 5 mg od	1
SURGICAL ASSESSMENT UNIT (DW)		Paracetamol 1g po qds lactulose 10ml po bd Fybogel T po bd			n/a
FAlcon	Chlorphenamine 4mg PO PRN Citalopram oral drops 40mg/ml 0.5ml OD AdCal D3 powder sachet BD Dermol lotion 500 TOP PRN E45 TOP PRN Hypromellose EDs 0.3% TDS PRN Lansoprazole 30mg fast tab PO OD Liquid Parrafin light 63.4% use in bath Mirtazapine Disp 30mg ON Nutilis Powder one spoonful Nutrison soya Multi Fibre Paracetamol Soluble 1g QDS PRN Senna oral solution 7.5mg/5ml 10ml OD Trimethoprim suspen…	Solifenacin for hyper-relexic bladder Prophylactic Trimethoprim stopped as consultant Mr. Kulkarni thought it unnecessary		-Solifenacin 5mg PEG OD- disperse in water (do not crush) -Chlorphenamine 4mg PO PRN max 24mg/day -Citalopram oral drops 40mg/ml 0.5ml OD -calfovit D3 powder sachet BD -Lansoprazole 30mg fast tab PO OD -Mirtazapine Disp 30mg ON -Paracetamol Soluble	1
BIRCH WARD WWW	Perindopril 2mg OD PO Bendroflumethiazide 2.5mg OD PO Aspirin 75mg OD PO Amlodipine 5mg OD PO Bisoprolol 1.25mg OD PO Atorvastatin 40mg PO OD			Atorvastatin 40mg po on Lansoprazole 30mg po od Fortisips T po tds Furosemide 40mg po od [mane]	1
ASPEN WARD	Ethambutol 100mg PO OD Rifampicin 150mg PO OD Spiriva 2.5mg 2 puffs INH OD Seretide 250mg 2 puffs INH BD Forticips one PO OD Clarithromycin 250mg PO BD Rifampicin 300mg PO OD Ethambutol 400mg PO OD Salbutamol 2 puffs INH PRN Tiotropium 18micrograms 1puff INH OD	CHANGE increase forticips ADD Tazocin 4.5g IV TDS for a 14 day course up to and including 01/05		Seretide 250mg 2 puffs INH BD Forticips one PO TDS Rifampicin 450mg PO OD Ethambutol 500mg PO OD Clarithromycin 250mg PO BD Tazocin 4.5g IV TDS up to and including 05/05 Tiotropium 18micrograms 1puff INH OD Spiriva 18mcg T puffs INH OD Salbutamol 2 puffs INH PRN	1
SWAN - ORTHO	Amitryptyline 10mg OD Co-Dydramol OCP			Paracetamol 1g QDS PRN Amitryptiline 10mg ON Lactulose 10ml OD Senna TT ON Movicol TT OD Tramadol SR 50mg BD Gaviscon 10ml TDS mdu	1
HERON WARD	Nil	Nil		Gaviscon 10mls PO PRN	1
CEDAR WARD	Azathioprine 100mg OM Cetirizine 10mg BD Bisoprolol 2.5mg OM Aspirin 75mg OD Lisinopril 5mg OD Pravastatin 20mg ON Glicazide 80mg OD	ADDED: Paracetamol 1g QDS Codeine phosphate 30-60mg QDS STOPPED TEMPORARILY DURING PERIOD OF INFECTION: Azathioprine 100mg OM STOPPED: Asprin 75mg PO due to subdural haematoma		*MDS* Boots Pharmacy 11-13 Broadway, Knaphill, GU212DR. Tray ready tomorrow (2/5/13) Azathioprine 100mg OM - to restart on day of discharge please Cetirizine 10mg od Bisoprolol 2.5mg OM Lisinopril 5mg OD Pravastatin 20mg ON Paracetamol 1g QDS Codeine phosphate 30-60mg QDS prn Lactulose 10ml PO BD	1
HERON WARD	Adizem XL 180mg od po Levothyroxine 100mcg od Prozac - fluoxetine 20mg od Clopidogrel 75mg od po HRT 1mg od Diazepam 2mg PRN Vitamin C 500mg	added antiemetics and statin for carotid stenosis (gets unwell with statins)		Adizem XL 180mg od po Levothyroxine 100mcg od Prozac - fluoxetine 20mg od Clopidogrel 75mg od po HRT 1mg od Diazepam 2mg PRN Vitamin C 500mg Maxalon 10mg tds po PRN for at least 3/7 please Eczetimibe 10mg od po	3
WORDSWORTH WARD Prev at SWAN - ORTHO under MR SP TRIKHA (SPH)	Candesartan 4mg OD	Ibuprofen 200-400mg TDS PRN (stopped)		Oramorph 5-10mg 2-4 hourly/prn Candesartan 4mg OD Paracetamol 1g QDS Codeine phosphate 30mg qds Nitrofurantoin 50mg qds (started 1/5/13 and to stop 7/5/13)	1
MEDICAL ASSESSMENT UNIT	Vitamin B co-strong TT PO OD Omeprazole 20mg PO OD Thiamine 100mg PO BD Folic Acid 5mg PO OD Forticips T PO BD Spirinolactone 100mg PO OD Adcal D3 T PO BD Alendronic Acid 70mg PO once weekly on saturday Salbutamol inh PRN Amitriptylline 50mg PO ON	Omeprazole increased to 40 mg once daily		Vitamin B co-strong TT PO OD Omeprazole 40mg PO OD Thiamine 100mg PO BD Folic Acid 5mg PO OD Forticips T PO BD Spirinolactone 100mg PO OD Adcal D3 T PO BD Alendronic Acid 70mg PO once weekly on saturday Salbutamol inh PRN Amitriptylline 50mg PO ON	2
MAPLE WARD	Gliclazide 80mg PO BD Atorvastatin 20mg PO ON Seretide 500 accuhaler T INH BD Loratidine 10mg PO OM Salbutamol ACC TT INH PRN Exemestane 25mg PO OM Ondansetron 4mg PO TDS Diazepam 4mg PO ON Ramipril 10mg PO OM Felodipine MR 2.5mg PO OM Lantus solostar SC Calcium ergocalciferol T PO OD Omeprazole 20mg PO BD Paracetamol Senna TT PO BD	Antibiotics added for cellulitis (5 day course in total) Gliclazide stopped Humulin M3 added Lantus solostar stopped Movicol 1 sachet PO OD		Flucloxacillin 500mg PO QDS until and including 1st May Penicillin V 500mg PO QDS until and including 1st May Atorvastatin 20mg PO ON Seretide 500 accuhaler T INH BD salbutamol accuhaler 1 prn Loratidine 10mg PO OD Exemestane 25mg PO OD Ondansetron 4mg PO TDS Diazepam 4mg PO ON omeprazole 20mg PO BD fortisips T PO TDS Paracetamol 1g PO QDS PRN Folic acid 5mg PO OD Ferrous fumarate 210mg PO BD Hum…	2
MED SHORT STAY UNIT	NIL regular	NIL		Paracetamol 1g QDS PRN Diazepam 10mg PR , PRN	1
MAY WARD	NIL REGULAR			Lansoprazole 30mg OD. paracetmaol 1g qds for 7/7 flucloxacillin 500mg qds for 7/7 up to and inclduing 7/5/13	1
SWAN - ORTHO				Co-dydramol 2 tabs QDS PRN Ibuprofen 400mg TDS PRN	n/a
WORDSWORTH WARD		the following were all ceased during inpatient stay: atorvastatin 40mg on atenolol 50mg od ramipril 5mg bd amlodipine 5mg od ISMN MR 60mg od nicorandil 10mg bd omacor 1g od dosulepin 25mg od bendrofluazide 2.5mg od		Oramorph 5mg prn 2-4 hourly prn Paracetamol 1g qds Nicotin patch 21mg transdermal patch top. od Fortisip T tds Lansoprazole 30mg od Salbutamol 100mcg 2 prn Gabapentin 100mg tds Beclometasone 100mcg INH. TT puff bd Aspirin 75mg od Zolpidem 5mg od (nocte)	n/a
SWAN - ORTHO				Carbamazepine 400mg BD Paracetamol 1g QDS PRN Ibuprofen 400mg TDS PRN Codeine phosphate 60mg QDS PRN Estradiol 2mg OD	n/a
MED SHORT STAY UNIT Fielding	amoxicillin 500 mg tds po until 2/4/13 clarithromycin 500 mg , po bd until 2/14/13 furosemide 20 mg od ferrous fumarate 210 mg od lorazepam 1mg po on atorvastatin 20 mg on lansoprazole 15 mg od ramipril 5 mg po, od Ganfort eye drops T BE OD Movicol TT oral BD PRN aquoes cream Betnovate cream 0.1% appl topically.	prednisolone added Atorvastatin stopped.		ferrous fumarate 210 mg od lorazepam 1mg po on ramipril 5 mg po, on Ganfort eye drops T BE OD Movicol T oral BD PARACETAMOL 1 GRAM QDS. Mirtazepine 15 mg on Amlodipine 5 mg od carbocysteine 375 mg tds Adcal D3 1 TAB BD Prednisolone 15 mg od	1
KINGFISHER WARD	Amlodipine 5mg PO OD Pravastatin 20mg PO ON Clexane injection 90mg S/C ON Co-codamol 15/500mg PO TT QDS PRN			Amlodipine 5mg PO OD Pravastatin 20mg PO ON Clexane injection 90mg S/C ON Co-codamol 15/500mg PO TT QDS PRN	0
MED SHORT STAY UNIT				Etrapenem 1g OD until 04/05/13 normal saline 0.9% 10ml vials use for recosntitution and as flush as required normal saline 0.9% 50ml bags use as diluent as required Levothyroxine 100mcg Om Lansoprazole 30mg OD Telmisartan 20mg OD Adcal D3 effervescent T BD Paracetamol 1g QDS Senna 2 tablets ON Lactulose 10ml BD Nasonex spray 50mcg nasal spray OD Alendronic acid 70mg once weekly .	n/a
MED SHORT STAY UNIT		Increase the dose of simvastatin to 40mg once daily .		Aspirin 300mg OD Lansoprazole 30mg OD Simvastatin 40mg oN Tamsulosin 400mcg OD	n/a
SWAN - ORTHO	Paracetamol 500mg qds Sertraline 50mg on Spiricolactone 25mg om Conotrane cream top bd E45 Cream top bd Macrogol T bds Aciclovir 800mg 5 times daily Omeprazole 20mg od Donepezil 10mg om Metformin 500mg bd Digoxin 62.5micrograms om Aspirin 75mg od Folic acid 5mg od	The followig medications were stopped due to and EGFR of 40: Metformin Spirinolactone Donepezil *GP please review * She was started on Ferrous sulphate 200mg tds		Paracetamol 500mg qds Sertraline 50mg on Conotrane cream top bd E45 Cream top bd Macrogol T bds Omeprazole 20mg od Digoxin 62.5micrograms om Aspirin 75mg od Folic acid 5mg od Ferrous sulphate 200mg tds	3
DICKENS				Paracetamol 1g 4 times daily Omeprazole 20mg in the morn Vitamin B CO strong 2 tabs in the morn Naproxen 500mg twice daily Lisinopril 10mg in the morn Thiamine 100mg 3 times daily Aspirin 75mg (for 6 weeks)	n/a
MED SHORT STAY UNIT	Adalat retard 20mg BD Dixarit 25mcg Warfarin 3mg mon-fri/3.5mg sat and sun Simvastation 40mg ON Tamsulosin m/r 400mcg OD Bisoprolol 2.5mg OD	Ferrous sulphate 200mg TDS added Warfarin held during admission as INR 4.8 (to be restarted when therapeutic)		Dixarit 25mcg Simvastation 40mg ON Tamsulosin m/r 400mcg OD Bisoprolol 2.5mg OD Ferrous sulphate 200mg TDS Warfarin 2mg PO OD	1
SURGICAL ASSESSMENT UNIT (DW)					no
SWAN - ORTHO				Paracetamol 1g QDS PRN Naproxen 500mg BD PRN Tramadol 100mg TDS PRN Oral morphine solution 10mg/5ml (TEN MILLIGRAMS IN FIVE MILLILITRES) TAKE 15mg -20mg (FIFTEEN TO TWENTY MILLIGRAMS) EVERY TWO TO FOUR HOURS AS NEEDED. PLEASE GIVE A THREE DAY SUPPLY	n/a
ASPEN WARD	Irbesartan+hydrochlorothiazide 150/12.5mg OD Atorvastatin 20mg ON Aspirin 75mg OD			Ciprofloxacin 500mg BD for 5/7 Irbesartan+hydrochlorothiazide 150/12.5mg Om Atorvastatin 20mg ON Aspirin 75mg OD	1
MAPLE WARD	sodium valproate 900mg po OD in the morning sodium valproate 1200mg po at 1800 venlafaxine 75mg po BD Tiotropium 18 mcg inhaler OD Simvastatin 40mg po ON carbocysteine 375mg po TDS seretide 500 1 puff inhaler BD vitamin d3 1600units oral BD for 2/52 Novorapid s/c 5-8 units TDS Lantus 26units s/c OD @ 0800 Chlorpromazine 25 mg PO ON (Pt reports taking one or 2 tablets at night) - Amended by M Golo…			clarithromycin 500mg po BD starting on 25/4/13. please supply 3 tablets. sodium valproate MR 900mg po OD in the morning sodium valproate MR 1200mg po at 1800 venlafaxine 75mg po BD Tiotropium 18 mcg inhaler OD Simvastatin 40mg po ON( withold while on clarithromycin, restart on 2/5/13) carbocysteine 375mg po TDS seretide accuhaler 500 1 puff inhaler BD vitamin d3 1600units oral BD for 2/52 Novorap…	1
CORONARY CARE	Perindopril 4mg od Atorvastatin 40mg nocte Salbutamol evohaler TT prn Ipratropium 250mcg neb Tiotropium handihaler 18mcg od inh Clenil modulite 200mcg bd inh Paracetamol 500mg T-TT qds prn Ibuprofen 400mg tds prn	Verapamil 40mg tds started		Perindopril 4mg od po Atorvastatin 40mg nocte po Tiotropium handihaler 18mcg T od inh Clenil modulite 200mcg T bd inh Verapamil 40mg tds po Salbutamol inhaler TT PRN	1
FALCON WARD	Pramipexole Stalevo.			Finasteride 5mg PO OM Paracetamol 1G PO QDS Stelevo (175mg PO 6am, 125mg PO at 10.30, 14.00, 17.00 and 20.00, and 200mg PO at midnight) Pramiprexole2.62mg PO Midnight Loperamide 4mg PO BD Amytriptyline 30mg PO ON Enoxaparin 40mg S/C od (up to and including 20/5 2013)	1
FALCON WARD				Paracetamol 1G PO QDS PRN Lansoprazole fastabs 30mg PO BD Tramodol 50mg PO TDS PRN Clarythromycin 500mg PO BD (started 25/4/13 for 2 weeks please) Amoxicillin 1G PO TDS (started 25/4/13 for two weeks please)	n/a
MED SHORT STAY UNIT		Increase the dose of frusemide and ramipril.		Frusemide 40mg BD Aspirin 75mg OD Atorvastatin 80mg ON Levothyroxine 75mcg OD Bisoprolol 5mg OD Lansoprazole 30mg OD Clopidogrel 75mg OD Spironolactone 25mg OD Butrans patch 5mcg/hr once weekly Please suplly 2 (two) patches. Movicol T BD Ramipril 7.5mg OD Clonazepam 0.5mg ON	n/a
MED SHORT STAY UNIT		stopped fludricortisone .		Paracetamol 1g QDS Clopidogrel 75mg OD Atorvastatin 80mg ON Folic acid 5mg OD Ferrous sulphate 200mg TDS Lansoprazole 30mg OD Bisoprolol 5mg OD Pregabalin 50mg BD Fortisip T BD	n/a
MED SHORT STAY UNIT	Aspirin 75mg oD Dipyradimole MR 200mg BD Finasteride 5mg OD Adcal D3 T caplet BD Alendronic acid 70mg once weekly Alfuzocin 2.5mg OD Movicol T OD Lansoprazole 15mg OD Tramadol 50mg OD Paracetamol 1g QDS Casodex 50mg OD Zoladex LA 10.8mh implant due 10/05/13 Bicalutanide 50mg PO OD	Tramadol 50mg OD Stopped Alfuzocin 2.5mg OD stopped Folic acid 5mg PO OD started		Aspirin 75mg oD Dipyradimole MR 200mg BD Finasteride 5mg OD Adcal D3 T caplet BD Alendronic acid 70mg once weekly Macrogol T OD Folic acid 5mg OD Lansoprazole 15mg OD Paracetamol 1g QDS Casodex 50mg OD	2
DICKENS	Aliskiren 150mg OD Paracetamol 1g QDS Codeine phosphate 15mg NOCTE Amlodipine 5mg OD			Aliskiren 150mg OD Codeine phosphate 15mg NOCTE Amlodipine 5mg OD Bendroflumethiazide 2.5mg OD Co-codamol 30/500 QDS	1
SWAN - ORTHO				Trimethoprim 200mg BD 7 day course upto and including 6/5/13 Bicalutamide 150mg OD Paracetamol 1g QDS PRN	n/a
MAPLE WARD	Salbutamol Inhaler TT PRN	Started Paracetamol, Omeprazole and Bonjela	Cefuroxime and Enoxaparin	Paracetamol 1g PO QDS (PRN) Omeprazole 20mg PO OD (for 4 weeks only) Salbutamol T-TT puffs, PRN dentinox Ointment, T, Buccal, PRN	2
DISCHARGE LOUNGE (St Peter's)				Flucloxacillin 500mg QDS until 04/05/13 warfarin As Per INR Pravastatin 40mg ON Lansoprazole 15mg OD Bisoprolol 10mg OD Prednisolone 20mg OD b titrate it down to 5mg in 4 weeks. Naproxen 250mg TDS until 02/05/13 Paracetamol 1g QDS	n/a
MED SHORT STAY UNIT				sando-K 2tablets BD 2 days then stop. Phosphate enema T for 7 days . Ferrous fumarate 210mg TDS Omeprazole 40mg OD senna 2 tablets ON Lactulose 10ml bd No other changes .	n/a
SWAN - ORTHO				Tramadol 100mg BD Paracetamol 1g QDS PRN Ibuprofen 400mg TDS PRN *PATIENT HAS OWN SUPPLY OF THESE DRUGS AND DOES NOT WANT THEM DISPENSED BY HOSPITAL*	n/a
SWAN - ORTHO	Fluoxietine 20 mg OD Levemir 15 Units Breakfast Levemir 12 Units Evening Meal Novorapid 8 Units 3 times a day Atorvastatin 30 mg ON Perindopril 2 mg PO OD Lansoprazole 30 mg OD Vitamin B CO STRONG T BD Thiamine 100 mg BD Senna TT ON			Fluoxietine 20 mg OD Levemir 15 Units Breakfast Levemir 12 Units Evening Meal Novorapid 8 Units 3 times a day Atorvastatin 20 mg ON Perindopril 2 mg PO OD Lansoprazole 30 mg OM Vitamin B CO STRONG T BD Thiamine 100 mg BD Senna TT ON Tramadol SR 50 mg BD 5 days worth PRN use Paracetamol 1 g QDS 5 days	1
SWAN - ORTHO				Paracetamnol 1g QDS PRN Ibuprofen 400mg TDS PRN	n/a
SWAN - ORTHO				Alendronic acid 70 mg OW on Tuesdays Adcal D3 T BD Macrogol TT BD Bisoprolol 2.5 mg OD Paracetamol 1 g QDS Codeine phosphate 30 mg QDS prn	n/a
MED SHORT STAY UNIT				Gliclazide 160mg BD	n/a
MED SHORT STAY UNIT		Stop aspirin and dipyradimole, ISMN, Risedronate Lansoprazole increase to 30 mg once daily .		Cefalexin 500mg ON long term prophylaxis Madopar100/25 T TDS Half sinemet MR T BD Memantine 5mg BD Macrogol T BD Ferrous sulphate 200mg BD Lansoprazole 30mg OD	n/a
PAEDIATRIC ASSESSMENT UNIT	Nil			Movicol 1 sachet BD	1
SURGICAL ASSESSMENT UNIT (DW)	Warfarin Aspirin Bisoprolol Ezetimibe Perindopril Pravastatin Tamsulosin	Clexane added temporarily		Aspirin 75mg PO OM Bisoprolol 5mg PO OM Ezetimibe 10mg PO ON Perindopril 8mg PO OM Pravastatin 40mg PO ON Tamsulosin 400 micrograms PO ON Enoxaparin 115mg S/C OD (up until the patient's INR is theraoeutic (over 2.5) Warfarin 4.5mg PO OD	2
KINGFISHER WARD				oral doxycycline 100mg po BD for total 14 days oral Metronidazole 400mg TDS for 14 days	1
CEDAR WARD	Clopidogrel 75mg OD Duloxetine 60mg OD Lansoprazole 15mg OD Perindopril 15mg OD Adcal D3 T, BD Alendronic acide 70mg Fridays Paracetamol 1g QDS Allpurinol 100mg OD Atenolol 25mg OD Atorvastatin 40mg OM Baclofen 10mg BD Butrans patch weekly (Tuesdays) Laxido BD	Nil	IV temocillin IV metronidazole	Clopidogrel 75mg OD Duloxetine 60mg OD Lansoprazole 15mg OD Perindopril 15mg OD Adcal D3 T, BD Alendronic acid 70mg Fridays Paracetamol 1g QDS Allopurinol 100mg OD Atenolol 25mg OD Atorvastatin 40mg ON Baclofen 10mg BD Butrans 10 patch weekly (Tuesdays) Laxido BD	0
SURGICAL ASSESSMENT UNIT (DW)		none		Paracetamol 1g QDS Ibuprofen 400mg TDS Insulin - variable; patient self administering	0
JOAN BOOKER WARD				Paracetamol 1 gram qds Ibuprofen 600mg tds Bisoprolol 2.5mg od Lactulose 10mls bd Enoxaparin 40mg bd 7 days	n/a
DICKENS	Adcal D3 one tablet BD Bendroflumethiazide 2.5mg OD Amlodipine 5mg OD Co-dydramol 10mg/500mg PRN Ramipril 2.5mg OD Seretide 125 evohaler 1 puff BD Salbutamol inhaler PRN			Adcal D3 one tablet BD Bendroflumethiazide 2.5mg OD Amlodipine 5mg OD Co-dydramol 10mg/500mg PRN Ramipril 2.5mg OD Seretide 125 evohaler 1 puff BD Salbutamol inhaler PRN Tramadol 100mg SR BD Paracetamol 1g QDS	1
FALCON WARD	Losartan 50mg PO OD Losartan 25mg PO OD Simvastatin 10mg PO ON Lercanipine 10mg PO OD	Senna started		Losartan 50mg PO OD Losartan 25mg PO OD Simvastatin 10mg PO ON Lercanipine 10mg PO OD Senna T PO ON	2
MED SHORT STAY UNIT	Simvastatin Amlodipine Tramadol Tiotropium salbutamol Alendronic acid Clopidogrel lactulose	Oxybutyninie, quinine sulphate and adcal d3 started on this admission . Clopidogrel changed to aspirin and atovastatin stopped		Simvastatin 10mg po ON Paracetamol 1gr PO QDS Amlodipine 5mg po OD Aspirin 75mg po OD Alendronic acid 70mg po weekly every MONDAY Lactulose 10ml po PD Senna TT po BD Adcal D3 TT po OD Tiotropium 18mcg T OD Salbutamol 1-2 puff PRN Oxybutinine 5mg po OD Quinine salphate 200mg po ON	2
CORONARY CARE	Nil	ADD: Aspirin 75mg od po - for life Clopidogrel 75mg od po for one year Bisoprolol 2.5mg od po Atorvastatin 80mg nocte po Ramipril 1.25mg od po		Aspirin 75mg od po - for life Clopidogrel 75mg od po for one year Bisoprolol 2.5mg od po Atorvastatin 80mg nocte po Ramipril 1.25mg od po GTN Spray 2puffs prn s/l	1
KINGFISHER WARD	Aspirin 75mg PO OD Metoprolol 50mg BD Co-dyrdramol 10/500 QDS PRN Seretide inhaler - one puff OD			Aspirin 75mg PO OD Metoprolol 50mg BD Co-dyrdramol 10/500 QDS PRN Seretide inhaler - one puff OD	0
SWAN - ORTHO				Paracetamol 1g QDS Codeine Phosophate 60 mg QDS	n/a
MEDICAL ASSESSMENT UNIT	nil				no
ASH WARD				Doxycycline 100mg BD for total 14 days has 5 days own supply	n/a
SWAN - ORTHO				Co-codamol 30/500 two tablets QDS PRN Oxycodone 5mg BD (FIVE MILLIGRAMS TWICE A DAY) when required Oxycodone modified release 20mg BD (TWENTY MILLIGRAMS TWICE A DAY) when required	n/a
KINGFISHER WARD		Started: Co-amoxiclav 625mg PO TDS (final dose 2200 7/5/13) Mebeverine 135mg PO TDS		Metronidazole 400mg tds up to and including 5/5/13 Laxido PO 1 sachet QDS PRN Bumetanide 1mg PO OM Pravastatin 20mg PO ON Ivabradine 2.5mg PO BD Olmesartan medoximil 20mg PO OM Tildem LA 300mg PO OM Seretide 250 Evohaler TT INH BD Ferrous sulphate 200mg PO TDS Isosorbide mononitrate MR 30mg PO OM Lantus solostar 40units SC ON Humalog Kwikpen 14 units SC TDS Lansoprazole 3 0mg PO OM Tramadol 50-10…	n/a
ASH WARD	nil regular	Humalog 3ml pen cartridge (1) Lantus SoloStar pre-filled pen (1) Contour Next glucose test strips (1 box) Ketostix (1 box)		Humalog 3ml pen cartridge (1) Lantus SoloStar pre-filled pen (1) Contour Next glucose test strips (1 box) Ketostix (1 box)	2
SURGICAL ASSESSMENT UNIT (DW)	Quinine sulphate 300mg PO ON Ramipril 2.5mg PO OD Simvastatin 40mg PO ON Aspirin 75mg PO OD Bisoprolol 2.5mg PO OD	None		Quinine sulphate 300mg PO ON Ramipril 2.5mg PO OD Simvastatin 40mg PO ON Aspirin 75mg PO OD Bisoprolol 2.5mg PO OD	0
CLINICAL DECISION UNIT					no
KINGFISHER WARD	carbimazole	PRN analgesia levothyroxine to commence 1 week post discharge Stop carbimazole		levothyroxine 100 micrograms OD - to commence on 7/5/13 paracetamol 1gram PO QDS PRN for 7 days dihyrocodiene 30mg PO QDS PRN for up to 7 days	2
KINGFISHER WARD	lisinopril 2.5mg pregabalin 25mg	prn analgesia added		paracetamol 1g PO QDS PRN up to 7 days dihydrocodeine 30mg QDS PRN up to 7 days lisinopril 2.5mg OD pregabalin 25mg ON	3
THEATRE WARD (SPH)				Co-codamol 30/500 1-2 tablets up to 4x daily - maimum 8 tablets in 24 hours	n/a
MEDICAL ASSESSMENT UNIT	Amoxicillin Prednisolone Levothyroxine Omeprazole Carbocisteine Symbicort			Amoxicillin 500mg tds for 7 days - STOP ON THE 7/5/13 Levothyroxine 100micrograms od Omeprazole 20mg od Carbocistiene 750mg bd Symbicort 200/6 TT bd Prednisolone 10mg, then reduce to 5 mg od from 8/5/13	1
DICKENS				Paracetamol 1g 4 times daily Lactulose 20ml in the morning Lisinopril 10mg in morn Atorvastatin 10mg at night Atenolol 100mg in the morn Amlodipine 10mg in morn Allopurinol 300mg in morn Tramadol 100mg twice daily Aspirin 75mg in the morning (for 6 weeks)	n/a
THEATRE WARD (SPH)				Tramadol 50-100mg up to 4x daily Paracetamol 1g 4x daily - maximum 8 tablets in 24 hours Ibuprofen 200mg 3x daily	n/a
MED SHORT STAY UNIT		Hold metformin due to low GFR .		Augmentin 625 mg TDS until 06/05/13 Atenolol 100mg OD Ramipril 10mg OD Simvastatin 40mg ON Bendroflumethiazide 2.5mg OD Donepezil 10mg OD Gliclazide 80mg OD	n/a
SAU VIRTUAL WARD				Co-codamol 30/500 1-2 tablets PO QDS PRN Metronidazole 400mg PO TDS (up to and including (6/5/2013)	n/a
ASH WARD	creams and steroids for eczema antihistamines prn	haelan tape to dorsum of feet epiderm cream tds		haelan tape to dorsum of feet epiderm cream tds	1
BIRCH WARD	Warfarin asd Lisinopril 5mg OD Simvastatin Bisoprolol 2.5mg OD Seretide 250 2 puffs inh BD Tiotropium 18 mcg OD Furosemide 40mg OD regularly (plus 20mg OD PRN) Trimethoprim 100mg OD Tamsulosin MR 400 mcg OD Atorvastatin 80mg OD GTN spray PRN	Lisinopril stopped as patient normotensive throughout admission.		Warfarin asd Atorvastatin 80mg OD Bisoprolol 2.5mg OD Seretide 250 2 puffs inh BD Tiotropium 18 mcg OD Furosemide 40mg OM Trimethoprim 100mg ON Tamsulosin MR 400 mcg OD GTN spray PRN	3
MEDICAL ASSESSMENT UNIT				Patient uses a compliance aid supplied by Boots pharmacy, 1-9 commercial way, woking, GU21 17A. tel 01483761648, fax 01483765171. Patients son discharged patient without dossett being arranged, ward faxed across discharge letter without pharmacy knowledge. Digoxin stopped, only medication change. Levothyroxine 50 micrograms OD Aspirin 75mg OD Frusemide 80mg om	1
MAPLE WARD					no
MED SHORT STAY UNIT				Lantus 21units ON Novorapid 5-20units at lunch time .	n/a
BIRCH WARD				Gliclazide MR 30mg od Simvastatin 40mg on Omeprazole 20mg od Warafrin variable	n/a
SAU VIRTUAL WARD		Nil			no
OAK WARD	None				no
MAU	Paracetamol Furosemide 40 mg od Mesalazine 1 g tds Seretide 125 one puff bd Spiriva 18 mcg one puff om Lansoprazole 30 mg od Ramipril 2.5 mg od Prednisolone 30 mg od Atenolol 25 mg od Clopidogrel 75 mg od Dihydrocodeine 30 mg prn for pain AdCal D3 one tablet bd Ezetimibe 10 mg on Simvastatin 40 mg on	Stopped seretide		As on admission minus the seretide	2
CEDAR WARD					no
ASH WARD	salbutamol prn	azithromycin 300mg od for one more day (6pm) prednisolone 40mg od for one more day (9am) salbutamol reducing regime		azithromycin 300mg od for one more day (6pm) prednisolone 40mg od for one more day (9am) salbutamol reducing regime	2
SURGICAL ASSESSMENT UNIT (DW)	Nil			Co-codamol 30/500 1-2 tablets PO QDS PRN Ciprofloxacin 500mg PO BD (up to and including 14/5/2013)	1
ASH WARD	None.			Reducing schedule of inhaled salbutamol. 30 mg Oral prednisolone further dose (total 3 days)	1
HOLLY WARD	Adcal D3 T BD Lansoprazole 30mg OD Alendronic acid 70mg weekly		Aspirin 300mg OD Simvastatin 40mg ON	Aspirin 300mg OD until 12/05/2013 then stop Clopidogrel 75mg OD to be commenced on 13/05/2013 Simvsatatin 40mg ON Adcal D3 T BD Lansoprazole 30mg OD Alendronic acid 70mg weekly	1	Abs%	% of changes
				Total with no changes	5	0.0543478
				Total with undocumented change(s)	32	0.347826	0.653061
				Total with documented change(s)	13	0.141304	0.265306
				Total with documented change(s), and reason(s)	4	0.0434783	0.0816327
				Total	92	0.586957	1
				Total with changes	49
				Total can't tell if changes	31
				total on no medication	7

## Sheet: June 5th
Ward	Medication on Admission	Medication Changes	Medication Loading Doses Administered	Medication on Discharge	0=no change, 1=change not documented, 2=changed & documented, 3=changed, doc, reasons, n/a = can't tell, no = no medication	Used Med Wizard?
JUNIPER WARD	Warfarin 5.5mg OD Bendrofluazide 2.5mg OD Atenolol 25mg OD Losartan 25mg OD Simvastatin 40mg OD Ferrous sulphate 1 tablet od po	decreased warfarin dose		Warfarin 3mg OD - unless changed by anticoagulation clinic Bendrofluazide 2.5mg OM Atenolol 25mg OD Losartan 25mg OD Simvastatin 40mg ON Paracetamol 1g QDS Tramadol S/R 50mg BD Daktakort cream, apply to back BD for 14 days total Beconase nasal spray i BN PRN with pt.	1
Wordsworth ward-Ashford Rehabilitation	Gabapentin 100m bd mebeverine 1354mg TDS Isosorbide mono nitrate20mg BD amlodipine 10mg Od lactulose 15ml BD codydramol 10/500 QDS aspirin 75mg OD bisoprolol 1.25mg OD Lansaprazole 30mg OD LAxido 2 sachet BD clenil modulite 100microgramsBD	gabapentin 300mg added stemetil 5mg tds-stopped betahistine started. Felbinac gel 3% for topical application (withheld and currently replaced with Zacin 0.025%top. cream) Sodium bicarbonate ear drops 2 drops tds for both ears (Stopped).		Canesten 1% top. tds stop on 09/05/2013) GTN S/L spray T-TT prn Gavison advance 15mls prn/qds Bisoprolol 1.25 mg od Macrogol T bd Clenil modulite 100micrograms bd Co-Dydramol 10/500 TT qds Salbutamol 100 microgram TT bd Prednisolone 15mg om (to be reduced by 2.5mg every month) E45 cream T top. tds Gabapentin 100mg bd (08:00, 12:00) Isosorbide mononitrate MR 40mg od Gabapentin 300mg od (nocte - 22…	1
BIRCH WARD WORDSWORTH WARD	Aspirin 75mg od Atorvastatin 40mg nocte Amiodarone 200mg od Clopidogrel 75mg od Slidenefield 25mg tds Digoxin 125mcg od Paracetamol 1g qds Furosemide 20mg bd Lansoprazole 30mg od Spironolactone 25mg od			Aspirin 75mg po od Atorvastatin 40mg po on Amiodarone 200mg po od Clopidogrel 75mg po om Sildenafil 25mg po tds Furosemide 40mg po bd Lansoprazole Fast Tab 30mg po od - at least 4 hours after clopidogrel Spironolactone 25mg po om Fortisip Compact 125ml po od Ferrous Sulphate 200mg po bd	1
CLINICAL DECISION UNIT	Aspirin 75mg ec od paracetamol 1gm qds adcal-D3 1 bd amitriptyline 25 mg od bisoprolol 2.5mg od senna 7.5mg 2 at bedtime citalopram 40mg od oxybutynin 5mg 1bd			Aspirin 75mg ec od paracetamol 1gm qds adcal-D3 1 bd amitriptyline 25 mg od bisoprolol 2.5mg od senna 7.5mg 2 at bedtime citalopram 30mg od oxybutynin 5mg 1bd Codeine phosphate 30mg qds	1
CLINICAL DECISION UNIT	Furosemide 20mg OM Levothyroxine 100micrograms OM Pantoprazole 20mg OM Asacol MR 800mg BD Prednisolone 5mg OM Loperamide 2mg QDS PRN Bisoprolol 1.25mg OM			Furosemide 20mg OM Levothyroxine 100 micrograms OM Pantoprazole 20mg OM Asacol MR 800mg BD Prednisolone 5mg OM Loperamide 2mg QDS PRN Bisoprolol 1.25mg OM Paracetamol 1g QDS Codeine 30mg QDS PRN Lactulose 10mls BD PRN	1
CHAUCER WARD		Glargine stopped (23/4)		Ferrous Fumerate 210 mg po bd Co-amilofurase 5/40 mg po od Omeprazole 40 mg po od Domperidone 10 mg po tds Humalin M3 18 units s/c at 1800 Metformin 1 gm po tds with meals Humalin M3 32 units s/c at 0800	n/a
MEDICAL ASSESSMENT UNIT Wordsworth Ward	Prednisolone 2mg po od Zolpidem 5mg po on Levothyroxine 75mcg po od Lansoprazole 30mg po od Adcal D3 po bd Vit B co strong Fortisip bd			Prednisolone 2mg po om Levothyroxine 75mcg po om Lansoprazole 30mg po od Adcal D3 po bd Vit B co strong 1 po od Fortisip bd Calogen Extra 30ml po bd	1
HOLLY WARD CHAUCER WARD				1.-Bisoprolol 2.5mg OD 2.-Ramipril 2.5mg OD 3.-Simvastatin 40mg ON 4.-Zopiclone 7.5mg ON 5.-Warfarin as per INR	n/a
MED SHORT STAY UNIT	Irbesartan 300mg PO OD Omeprazole 20mg PO ODOndansetron 4mg PO TDS metoclopramide 10mg PO TDS PRN medroxyprogesterone 200mg PO BD coseine 30-60mg PO QDS paracetamol 500-1g PO QDS enalapril 20mg PO OD levothyroxine 150mcg PO PO OD furosemide 40mg PO OD serovent 25mcg TT INH BD adalt MR 30mg PO OD dexamethosone 2mg PO TDS ensureplus T PO OD co-codamol 30/500 T-TT PO TDS PRN temazepam 20mg PO ON			Paracetamol 1g PO QDS PRN Metoclopramide 10mg PO TDS Levothyroxine 150mcg PO OM Temazepam 20mg PO ON Adcal D3 TT PO BD E45 cream T TOP TDS Lansoprazole 30mg PO OD Enoxaparin 120mg SC OD Serovent 25 TT INH BD Furosemide 40mg PO OM	1
WORDSWORTH	Azopt eye drops T right eye bd Alphagen 0.2% T BE bd Latanoprost T BE on Bendoflumetazide 2.5 mg po od Aspirin 75 mg po od Enalapril 20 mg po od Lercanidipine 10 mg p od Rosuvastatin 10 mg po on Sotalol 40 mg po odAspirin	Aspirin stopped. Reason: started Clopidogrel Started on Paracetamol . Reason: for pain Started on Movicol , senna. Reason: Constipation Sotolol stopped. Reason: Bisoprolol Enalapril stopped. Reason: Sttarted Ramipril Started on Lansoproazole . Reason: Coffee ground vomiting		Clopidogrel 75 mg po od Paracetamol 1 gm po qds Azopt eye drops T right eye bd Alphagen 0.2% T BE bd Latanoprost T BE on Rosuvastatin 10 mg po on Lansoprazole 30 mg po od Bisoprolol 1.25 mg po od Ramipril 1.25 mg po od Macrogol T po bd Senna TT po onParacetamol	3	y
SWAN - ORTHO Wordsworth ward	Diprobase cream Strontium 2gm on Macrogol 1 on Buprenorphine patch 5mcg/hr Adcal D3 caplets 2 bd Complan shake 1 od Lorazepam 0.5mg bd Mirtazapine disp30mg od Paracetamol 250-500mg qds prn	Buprenorphine patch 5mcg/hr--stopped Lorazepam 0.5mg bd-stopped Strontium 2gm on-stopped Fentanyl patch 12mcg/hr-started senna 1 po bd-started amlodipine 5mg od-started calogen extra 30mlspo bd-started		Paracetamol 1gm po qds Adcal D3 caplets 2 po od Lactulose 15mls po od Mirtazapine 30mg on Fentanyl patch 12mcg/hr(twelve) -one evry 3(three) days. Please supply 5 (Five) patches Fortisip compact 1 po tds senna 1 po bd amlodipine 5mg od calogen extra 30mls po bd	1
KINGFISHER WARD Holly	Alendronic acid 70mg PO once weeky Symbicort 2 puffs BD INH Beconase spray 1 puff per nostril OD Sabutamol 2 puffs PRN	ADDED: loperamide, lansoprazole		Loperamide tablets 4-12mg PO QDS - for ileostomy Alendronic acid 70mg PO once weeky Symbicort 200/6 2 puffs BD INH Beconase spray 1 puff per nostril OD Sabutamol 2 puffs PRN Paracetamol 1g PO QDS Aspirin 300mg for 3 more days clopidogrel 75mg od - start taking the day after aspirin is finished Simvastatin 40mg on Lansoprazole 30mg OD	1
FALCON WARD	Thiamine 100 mg PO TDS Vit B co strong TT PO TDS Omeproazole 20 mg PO OD Propranalol 20 mg PO TDS Venlaflaxine 75 mg Zomorph 40 mg PO BD	Propranalol 20 mg PO TDS stopped. Reason: Low BP, GP to r/v Venlaflaxine 75 mg weaned and stopped. Reason: Reaction with tramadol Started on Metoclopramide 10 mg PO TDS. Started on Tramadol 100 mg PO 6hrly. Started on Paracetamol 1 g PO 6 hourly. Started on Oromorph 20-30 mg 4 hrly Zomorph 40 mg PO BD decreased to Zomorph 30 mg PO BD.		Thiamine 100 mg PO TDS Vit B co strong TT PO TDS Omeprazole 20 mg PO OD Metoclopramide 10 mg PO TDS Tramadol 100 mg PO 6hrly if needed for pain Paracetamol 1 g PO 6 hourly if needed for pain Oromorph 10mg/5ml 20-30 mg 4 hrly if needed for pain Zomorph 30 mg Capsules, 30 mg bd. Please supply 28(twenty eight) capsules	3	y
HOLLY WARD	Sodium Valproate (Epilim Chrono) 400mg PO BD Adcal D3 T PO BD Lisinopril 10mg PO OD Fluticasone Furoate (Avamys) T TOP - Both nostrils	Started on Forticreme 1 pot PO BD. Started on Senna T PO Nocte. Started on Clopidogrel 75 mg PO OD. Reason: CVA		Sodium Valproate (Epilim Chrono) 400mg PO BD Adcal D3 T PO BD Lisinopril 10mg PO OD Fluticasone Furoate (Avamys) T TOP - Both nostrils OM Forticreme 1 pot PO BD Senna 15mg PO Nocte Clopidogrel 75 mg PO OD	3	y
MAPLE WARD	Ferrous fumurate adcal d3 simvastatin humulin m3 ramipril hydroxycobalamin	ferrous fumurate stopped adcal stopped simvastatin stopped		Lansoprazole 30mg fastab od Fortisip/ Fortijuice bd Lantus solostar 20 units s/c in the morning Lantus solostar 10 units s/c in the evening Novorapid flexpen 4-6 units with meals - 4 units if small meal, 6 units if large meal.	1
SURGICAL ASSESSMENT UNIT (DW)/kingfisher	salbutamol inhaler 2 puffs qds prn becotide inhaler 2 puffs bd			salbutamol inhaler 2 puffs qds prn becotide inhaler 2 puffs bd paracetamol 1g qds prn buscopan 20mg tds prn	1
WORDSWORTH WARD	Furosemide 20mg daily Bisoprolol 2.5mg daily Losartan 50mg Betahistine 8mg daily Co enzyme Q10 100mg daily			Oramorph 5-10mg 2-4 hourly /prn Furosemide 20mg daily Omeprazole 20mg od Bisoprolol 2.5mg daily Losartan 50mg od Betahistine 8mg daily Co enzyme Q10 100mg daily Paracetamol 1g qds Aspirin 75mg od Macrogol T od (12:00) Solifenacin 5mg od (nocte) Corsodyl mouthwash 10mls bd Pregabalin 75mg bd	1
CLINICAL DECISION UNIT	Propranolol 80mg BD Omeprazole 20mg Clonazepam 1.5mg Cobeneldopa 12.5/50 tds Solifenacin 5mg OD Sinemet 62.5 mg OD Sodium Valproate 300mg MR BD Duloxetine 60mg OD	Nil		As above	0
CLINICAL DECISION UNIT Wordsworth ward	levothyroxine 125mcg od, zolpidem 5mg , paracetamol 1gm qds Loratadine 10mg od Vit D1000 units od Calcium supplement 1 po od Vitamin B 1gm po qds---patient buys herself	added analgesia and laxatives short term		Oramorph 2.5 - 5mg 2-4 hourly prn levothyroxine 125mcg od zolpidem 7.5mg ON paracetamol 1gm qds senna 2 tabs bd Macrogol 1 po bd Adcal D3 1 po bd Alendronic acid 70mg once per week (Fridays)	1
MAY WARD				co-amoxiclav 250/62 oral suspension 10ml tds for 7/7 up to and including 09/06/13 Donepezil 10mg on levothyroxine 125 mcg om mirtazepine 15mg nocte buprenorphine patch 20mcg/hour (TWENTY MICROGRAM PER HOUR) topically. Change once a week, on saturdays. Please supply 4 (FOUR) patches. laxido T bd prn forticreme 1 pot bd paracetamol 1g soluble prn qds max	n/a
FALCON WARD				Fortisip TT PO TDS Paracetamol 1 g PO QDS Buscopan 20 mg PO TDS Sodium Docuaste 200 mg BD Laxido T PO BD Lansoprazole 30 mg PO OD(noon) Omitted medication: Cetirizine 10mg tablets Zopiclone 3.75mg tablets Chlorphenamine 4mg tablets E45 cream	n/a
MEDICAL ASSESSMENT UNIT	Doxycycline 100mg po bd until 30/5/13 Senna TT po on Paracetamol 1gm po qds Fortisips T po tds Amlodipine 10 mg po od Calogen extra 30 mls po tds Propanalol 40mg po bd Glicazide 40mg po od Ezetimebe 10 mg po od Lansoprazole 30mg po od Trospium 20mg po bd Aspirin 75mg po od Bisacodyl 10mg po on Movicol TT po bd	Doxycycline 100mg po bd until 30/5/13 stopped. Senna TT po on stopped. Amlodipine 10 mg po od stopped. Ezetimebe 10 mg po od stopped. Bisacodyl 10mg po on stopped. Movicol TT po bd stopped. Started on Amoxicillin 500mg po tds until 5/6/13.		Paracetamol 1gm po qds fortisips T po tds Calogen extra 30 mls po tds Propanalol 40mg po bd Glicazide 40mg po od Lansoprazole 30mg po od Trospium 20mg po bd Aspirin 75mg po od Amoxicillin 500mg po tds up to and including 5/6/13	2	y
MED SHORT STAY UNIT	Amlodipine 10mg PO OM Adcal D3 1 PO BD Aspirin disp 75mg PO OD Atenolol 25mg PO OD Bendroflumethiazide 2.5mg PO OM Cinnarizine 15mg PO OD GTN 1 spray s/l prn Ranitidine 150mg PO BD Levothyroxine 100mcg PO OD Prednisolone 6mg PO Metformin 500mg PO BD Hypromellose 0.3% 1 prn	Prednisolone 6mg PO increased to Prednisolone 20mg PO . Reason: 5/7 of incresed dose for LRTI Metformin 500mg PO BD stopped for 4/7. Reason: Had CTPA and renal function decline Cinnarizine stopped, cetirizine startedStarted on Sando K 2 PO BD. Reason: for 2 days, low K+ Started on Clarithromycin 500mg PO BD. Reason: 5/7 course for LRTI		Amlodipine 10mg PO OM Adcal D3 1 PO BD Aspirin disp 75mg PO OD Atenolol 25mg PO OD Bendroflumethiazide 2.5mg PO OM Cinnarizine 15mg PO OD GTN 1 spray s/l prn Ranitidine 150mg PO BD Levothyroxine 100mcg PO OD Prednisolone 15mg PO then trying to reduce by GP . Hypromellose 0.3% 1 prn Cetirizine 5mg PO OD Clarithromycin 500mg PO BD until 05/06/13 Sando -k 2 tablets tds for 2 days Gliclazide 80mg OD	3	y
HOLLY WARD	Leveticeram 500mg bd Bendroflumethiazide 2.5mg od Ramipril 5mg od Omeprazole 20mg od Diazepam 2mg tds Zopiclone 3.75mg -7.5mg prn Sodium Valproate 1g bd - Stopped 26/4/13 Dexamethasone 8mg	Citalopram 10mg od started due to low mood Dexamethosone started after admission, now weaning off.		Paracetamol 1g qds prn Codeine phosphate 30-60mg qds prn Senna TT on prn Lansoprazole 30mg od Leveticeratam 1g bd Citalopram 10mg od Dexamethasone 1mg bd for 3 days, then 0.5mg BD for 3 days, then 0.5mg OM for 10 days, then stop. Diazepam 10mg PR PRN for complex seizures Macrogoll T bd PRN	1
BIRCH WARD	Citalopram Metformin Algesal Simvastatin Warfarin Terbenafine Gliclazide Co-codamol Ranitidine Spironolactone	Citalopram stopped as had not been taking this prior to admission. Metformin reduced to 500mg PO BD Algesal stopped as not required. Terbenafine not given as unsure how long had been on this. Started on Elocon ointment and Dermol solution Started Bumetanide Ranitidine stopped as not required Spironolactone stopped Started Sitagliptin		Ramipril 7.5mg PO OD Bisoprolol 2.5mg PO OD Bumetanide 2mg PO BD [mane and lunchtime] Simvastatin 40mg PO nocte Metformin 500mg PO BD Gliclazide 160mg PO BD Sitagliptin 100mg PO OD Elocon ointment T topical OD Dermol solution T topical OD for washing. Warfarin as per INR Co-codamol 30/500 T-TT PO PRN max QDS Folic acid 5mg PO OD Ferrous Sulphate 200mg PO BD	3	n
MED SHORT STAY UNIT Swift ward	Ramipril Ferrous sulphate 200mg bd Lansoprazole 15mg od Thyroxine 25 micrograms od Senna 2 bd Bisoprolol 1.25mg oral OD Clopidogrel Simvastatin	Ramipril was stopped Bisoprolol was increased		Bisoprolol 2.5mg od Clopidogrel 75mg od Ferrous sulphate 200mg bd Lansoprazole 15mg od Thyroxine 25 micrograms om Senna 2 bd Simvastatin 20mg on Adcal D3 T BD Folic Acid 5mg od po (Above mediations will be reviewed by GP on 2 weeks) Augmentin 625mg oral TDS 2 more days upto and including 6/6/13	2	n
MED SHORT STAY UNIT	Ferrous sulphate 200mg TDS Carbocisteine 750mg BD Strontium 2g ON Metformin 1g BD Lansoprazole 30mg OD Citalopram 10mg OD Adcal D3 T BD Folic acid 5mg OD Seretide 125 2 puffs BD Fludrocortisone 50mcvg OD Memantine 5mg BD	Stopped fludricortisone Lansoprazole decrease to 15mg once daily .		dosette box filled by Lloyds pharmacy, 8 avenue parade, sunbury. tw16 5Hs. tel/fax 01932782167 Ferrous sulphate 200mg TDS Carbocisteine 750mg tds Strontium 2g ON Metformin 1g BD Lansoprazole 15mg OD Citalopram 10mg OD Adcal D3 T BD Folic acid 5mg OD Seretide 125 evohaler 2 puffs BD Memantine 5mg BD	2	n
DICKENS				enoxaparin 40mg s/c od until INR >2, then STOP adizem (diltiazem) 240mg po od digoxin 250micrograms po od lactulose 10mls po bd senna one po bd cocodamol 30/500 two po qds warfarin 3mg and 3.5mg alternate days (anticoagulation clinic will advise dose thereafter after 10th June when repeat INR taken)	n/a
FALCON WARD			Warfarin 10mg PO 3/6 Warfarin 5mg PO 4/6 Warfarin 5mg PO 5/6	Paracetamol 1g PO QDS Solifenacin 10mg PO ON Simvastatin 20mg PO ON Citalopram 20mg PO OD Venlafaxine 37.5mg PO OD Lactulose 10mls PO BD Vitamin D 1000 units PO OD Tamsulosin MR micrograms PO OD Amiodarone 200mg PO BD - from 4/6/13 to 10/6/13 Amiodarone 200mg PO OD - on the 10/6/13 onwards Warfarin as per INR (usually 4-5mg) Enoxaparin 105mg SC OD until INR >2	n/a
LABOUR WARD				Paracetamol 1g PO QDS Ibuprofen 400mg PO TDS - Patient's own supply of these medications	n/a
MAY WARD	Mirtazepine 7.5mg ON Dipyridamole MR 200mg BD Fesoterodine 4mg OD Sodium valproate 300mg BD			Scandishake 120ml at 8:00 and 14:00 Sodium valproate 300mg BD Mirtazepine 15mg ON (increased whilst inpatient) Calogen extra 30mls TDS Dipyridamole M/R 200mg BD Fesoterodine 4mg M/R OD (omitted whilst inpatient but to continue on discharge)	1
MED SHORT STAY UNIT	Alendronic acid 70mg po weekly Pracetamol 1gr po QDS Ibuprofen 400mg po TDS Lisinopril20mg/hydrochlorothiazine12.5mg T OD Metformin 500mg po BD levothyroxine 75micgr /50micgr any other days tramadol 50mg po QDS Asprin 75mg po OD Adcal D3 T po BD Simvastatin 40mg po OD Cyclizine			Amoxicillin 500mg po TDS until and including 4/06/13 Metformin 500mg po BD Simvastatine 40mg po OD Lansoprazole 30mg po OD Movicol T-TT po BD	1
MED SHORT STAY UNIT	Sudafed T TDS			Coamoxicalv 625mg TDS until 10/06/13 Clarithromycin 500mg BD until 08/07/6/13 Sudafed T TDS	1
LABOUR WARD				Paracetamol 1g PO QDS Ibuprofen 400mg PO TDS - Patient's own supply of these medications	0
LABOUR WARD				Paracetamol and Ibuprofen (patients own) Codeine phosphate 30-60mg PO QDS 14 day supply Lactulose 10ml PO BD 14 day supply Ferrous Sulphate 200mg po bd	n/a
Cedar Ward	Madopar 100mg/25mg 1 QDS Xalancom eyedrops 1 BE NOCTE Adcal D3 1 BD Azopt 1drop Right eye BD Rotigoline 8mg patch NOCTE Sinemet 62.5mg QDS Clopidogrel 75mg OD Aricept 5mg NOCTE Donepazil 5mg PO ON			Rotigotine patch 12mg TOP - change every 24hours - please use S/C Midazolam for sympton control as appropriate	1
SAU VIRTUAL WARD		Nil changes		Omeprazole 20mg PO OD Aspirin 75mg PO OD Simvastatin 20mg PO ON Bendroflumethiazide 2.5mg PO OD	0
SAU VIRTUAL WARD				Tramadol 50-100mg up to 4x daily as required Single day of Diclofenac Suppository 50mg BD	n/a
LABOUR WARD				Paracetamol 1g PO QDS Ibuprofen 400mg PO TDS Enoxaparin 40mg SC OD 7 days TEDS Ferrous sulphate 200mg PO BD if Hb <10.5	n/a
LABOUR WARD				Paracetamol 1g PO QDS Ibuprofen 400mg PO TDS Enoxaparin 40mg SC OD 7 days Ferrous sulphate 200mg PO BD if Hb <10.5 TEDS	n/a
LABOUR WARD				Paracetamol 1g PO QDS Ibuprofen 400mg PO TDS - Patient's own supply of these medications	0
LABOUR WARD				Paracetamol 1g PO QDS Ibuprofen 400mg PO TDS - Patient's own supply of these medications	0
CLINICAL DECISION UNIT	prn paracetamol				n/a
CLINICAL DECISION UNIT	Propranolol 80mg BD Omeprazole 20mg Clonazepam 1.5mg Cobeneldopa 12.5/50 tds Solifenacin 5mg OD Sinemet 62.5 mg OD Sodium Valproate 300mg MR BD Duloxetine 60mg OD			Propranolol 80mg BD Omeprazole 20mg Clonazepam 1.5mg Cobeneldopa 12.5/50 tds Solifenacin 5mg OD Sinemet 62.5 mg OD Sodium Valproate 300mg MR BD Duloxetine 60mg OD	0
CLINICAL DECISION UNIT	Oromorph 5mg prn Lansoprazole 30mg daily Bendroflumethazide 2,5 mg daily Paracetamol 1gm tds Ibandronic acid 150mg PO 1st of month	none		Oromorph 5mg 4 hourly prn Lansoprazole 30mg daily Bendroflumethazide 2,5 mg daily om Paracetamol 1gm tds Ibandronic acid 150mg PO 1st of month	0
MAPLE WARD					no
NUFFIELD GUILDFORD SPH BEDS					no
SURGICAL ASSESSMENT UNIT (DW)	Nil			Co-amoxiclav 625mg TDS up until and including 11/6/13 Paracetamol 1 g PO 4 hrly Tramadol 50 mg PO 4 hrly PRN max 400 mg daily	2	n
SURGICAL ASSESSMENT UNIT	Nil regular			Paracetamol 1g PO QDS PRN	2	n
SURGICAL ASSESSMENT UNIT (DW)				Paracetamol 1 g PO QDS Lamotrigine 200 mg PO BD metoclopramide 10 mg PO TDS Tramadol 50 mg PO 4 hourly prn max QDS	n/a
SPECIAL CARE UNIT (JB)				Folic Acid (250micrograms/kg) 750micrograms po od	n/a
PAEDIATRIC ASSESSMENT UNIT					no
ASH WARD				Phenoxymethylpenicillin 500mg PO QDS for 10 days.	n/a	n
PAEDIATRIC ASSESSMENT UNIT					no
PAEDIATRIC ASSESSMENT UNIT					no
A&E -> MAY WARD					no
SAU VIRTUAL WARD				1. Co-amoxiclav 625mg PO TDS for 7/7	n/a	n
KINGFISHER WARD		Nil		Paracetamol 1G po QDS PRN Ibuprofen 400mg PO QDS PRN	n/a
KINGFISHER WARD				Paracetamol 1g QDS PRN Aspirin 75mg om 6/52 Omeprazole 20mg OD Omitted medication: Ibuprofen 400mg BD Ibuprofen 5% gel top BD Tramadol 50mg QDS prn Ferrous fumarate 210mg BD	1
FALCON WARD	Aspirin 75mg OD Fenofibrate 200mg OD			Aspirin 75mg OD Fenofibrate 200mg OD	0
SWAN - ORTHO				Paracetamol 1g QDS PRN Movicol two sachets BD Senna two tabs nocte PRN	n/a
FALCON WARD	Aspirin 300mg OD Rosuvastatin 5mg OD Montelukast 10mg OD Laxido 1 sachet OD Viscotears 1 drop TDS Hyromellose 0.3% OD Tamsulocin MR 400mcg OD Alendronic acid 70mg Wkly Colecalciferol 750+200BD Finasteride 5mg OD Omeprazole 20mg OD Ramipril 5mg OD	nil	Aspirin reduced to 75mg post op.	Aspirin 75mg OD Rosuvastatin 5mg OD Montelukast 10mg OD Laxido 1 sachet OD Viscotears 1 drop TDS Hyromellose 0.3% OD Tamsulocin MR 400mcg OD Alendronic acid 70mg Wkly Colecalciferol 750+200BD Finasteride 5mg OD Omeprazole 20mg OD Ramipril 5mg OD Lercanidipine 10mg BD Paracetamol 1g QDS	1
MAPLE WARD					no
MED SHORT STAY UNIT	Indapamide Co-dydramol Aspirin Rosuvastatin			Aspirin 75 mg OD Rosuvastatin 20mg ON Indapamide MR 1.5mg OD Co-dydramol 1-2 tablets . QDS, PRN	0
MAPLE WARD					no
ASH WARD					no
DISCHARGE LOUNGE (St Peter's)	gabapentin 300mg po bd co-codamol 30/500 T-TT po qds prn Celluvic 1% eye drop R eye T top 6 times a day naproxen 500mg po bd amitryptilline 10mg T on senna T on po	Started on Movicol TT po bd. Reason: constipation Started on nitrofurantion 50mg po qds until and including 09/06/2013. Reason: UTI		gabapentin 300mg po bd co-codamol 30/500 T-TT po qds prn Celluvic 1% eye drop R eye T top 6 times a day naproxen 500mg po bd amitryptilline 10mg T on senna T on po Movicol TT po bd nitrofurantion 50mg po qds until and including 09/06/2013	3	y
ASH WARD				1. Paracetamol 1g PO QDS/PRN 2. Ibuprofen 200mg PO TDS/PRN	n/a
OAK WARD	Beclomethasone 200 micrograms OD Flixonase nasal spray 1 puff each nostril	No change			0
MED SHORT STAY UNIT	Nil			Teicoplanin 400mg iv OD until 11/06/13 Normal saline flushes MDU paracetamol 1g QDS	2	n
MEDICAL ASSESSMENT UNIT	Salbutamol TT prn Ipratropium 20mcg T inh tds Perindopril 6mg PO OD Metformin MR 750mg PO BD Clopidogrel 75mg PO OD Letrozole 2.5mg PO OD Atorvastatin 20mg PO ON Bisoprolol 2.5mg PO OD Levothyroxine 100 micrograms PO OD Praxilene 100mg PO TDS Humalog Mix 50 (36 units OM, 24 units lunch, 28 units ON) Vitamin D3 100 iu po bd	Metformin was held because of renal impairment. Frusemide 40mg po bd started Fybogel T po od started		Salbutamol TT prn Ipratropium 20mcg T inh tds Perindopril 6mg PO OM Clopidogrel 75mg PO OM Letrozole 2.5mg PO OM Atorvastatin 20mg PO ON Bisoprolol 2.5mg PO OM Levothyroxine 100 micrograms PO OM Praxilene 100mg PO TDS Humalog Mix 50 (36 units OM, 24 units lunch, 28 units ON) Vitamin D3 1000 units po bd Frusemide 40mg po bd (8am, 12pm) started Fybogel T po od strated	2	n
FALCON WARD					no
OAK WARD	E45 Eumovate	No change			0
FALCON WARD					no
OAK WARD	NiI				no
ASH WARD	Topiramate 75mg bd Sodium Valproate 320mg bd				n/a
MED SHORT STAY UNIT				Felodipine MR 5mg OD Bisoprolol 1.25mg OD Adcal D3 T BD Lansoprazole 30mg OD Metoclopramide 10mg TDS Seretide 250 Acc T BD Prednisolone 5mg BD Paracetamol 1g QDS Morphine sulphate 10mg BD Please supply 28(twenty eight )tablets of 10mg (ten milligram ) morphine sulphate . Oramorph 5 - 10mg 4 hourly PRN Glycopyrronium s/c 200mcg -400mcg 4-6 hourly PRN Midazolam injection 10mg/2ml 2.5mg-5.0mg 4-6 ho…	n/a
MEDICAL ASSESSMENT UNIT	nil	none		none	n/a
ADMISSIONS LOUNGE (SPH)		no change		crestor 5mg od po fenofibrate	n/a
CLINICAL DECISION UNIT	salbutamol. ipratropium				n/a
MED SHORT STAY UNIT				Benzylpenecillin 1.2g TDS Flucloxacillin 2g iv QDS mirtazepine 45mg ON Venlafaxine MR 75mg OD Simvasatin 40mg oN Promazine 10ml TDS	n/a
LABOUR WARD				Ibuprofen and paracetamol (patients own)	0
LABOUR WARD				Lactulose 10ml PO BD for 14 days Paracetamol and Ibuprofen (patients own)	0
LABOUR WARD				Ibuprofen 400mg PO TDS PRN - Patient's own Paracetamol 1g PO QDS - Patient's own	0
DICKENS				calfovit d3 po od aspirin 75mg po od losartan/hydrochlorothiazide 50mg/12.5mg po od alendronate 70mg po once weekly beconase nasal spray two sprays both nostrils bd lansporazole 30mg po od co-codamol (30/500) TT po qds movicol T po bd	n/a
LABOUR WARD				Paracetamol 1g PO QDS - Patient's own Ibuprofen 400mg PO TDS - Patient's own	0
LABOUR WARD				Paracetamol 1g PO QDS Ibuprofen 400mg PO TDS (Patient's own supply of these medications)	0
KINGFISHER WARD				Paracetamol 1g QDS (prn) Ibuprofen 400mg TDS (prrn)	n/a	n
MED SHORT STAY UNIT	Metformin MR 1g BD Humalog Mix 25 kwikpen 40 units OM Humalog mix 25 kwikpen 28 units ON Atenolol 50mg OD Simvastatin 40mg ON Indapamide 2.5mg OD	Nil.		Metformin MR 1g BD Humalog Mix 25 kwikpen 40 units OM Humalog mix 25 kwikpen 28 units ON Atenolol 50mg OD Simvastatin 40mg ON Indapamide 2.5mg OD	0
MAY WARD	Amlodipine 5mg OM Aspirin 75mg OM Co-amilofruse 5/40mg OM Complan T QDS Diazepam 1mg ON Movicol T TDS Paracetamol 1 gram QDS Simvastatin 20mg ON			Amlodipine 5mg OM Aspirin 75mg OM Co-amilofruse 5/40mg OM Fortisip T QDS macrogols T BD prn Paracetamol 1 gram QDS prn Simvastatin 20mg ON Senna 7.5mg ON	1
ASH WARD	Salbutamol 100 micrograms 2-3 puffs INH PRN with spacer (usually 2-3 times/day before going to sleep)	Regular beclomethasone added 3 day course of prednisolone added 3 day course of azithromycin added		Salbutamol INH 100 micrograms as per reducing regimen to continue Beclomethasone 50 micrograms 2 puffs INH BD Azithromycin 130mg PO OD upto and including 6/6/13 Prednisolone 25mg PO OM upto and including 6/6/13	2	n
ASH WARD					no
SURGICAL ASSESSMENT UNIT (DW)				Co-amoxiclav 625mg PO TDS - please complete 7 day course Lumigen eye drops 1 drop BE ON	n/a
SURGICAL ASSESSMENT UNIT (DW)				Metronidazole 400mg PO TDS - please continue for 10 days Phenoxymethyl-penicillin 1g PO QDS - please continue for 10 days Flucloxacillin 500mg PO QDS - please continue for 10 days	n/a
MAPLE WARD	Amitriptylline liquid 10 mg on Aqueous cream topically to body Baclofen 10 mg om Biatain adhesive dressins 10cmx10cm to jejunostomy Citalopram 16 mg od Domperidone 10 mg qds Laxido sachets one om Olanzapine 2.5 mg on Paracetamol 1 g qds Simvastatin 20 mg on Sodium valproate 400 mg qds			Amitriptylline liquid 10 mg on Aqueous cream topically to body Baclofen liquid 10 mg om Biatain adhesive dressins 10cmx10cm to jejunostomy Citalopram drops 16 mg od Domperidone 10 mg qds Laxido sachets one om Olanzapine 2.5 mg on Paracetamol soluble 1 g qds prn Simvastatin 20 mg on Sodium valproate liquid 400 mg qds	0
LABOUR WARD				Paracetamol 1g QDS Ibuprofen 400mg TDS	n/a
CEDAR WARD	Aspirin 75mg PO OD Lansoprazole 15mg PO OD Senna 7.5mg PO Nocte	Aspirin 75mg PO OD stopped.		Lansoprazole 15mg PO OD Senna 7.5mg PO Nocte	2	y
HOLLY WARD	Clopidogrel 75mg OD Simvastatin 40mg ON Lansoprazole 30mg OD Citalopram 20mg OD Tafluprost T, both eyes	Stopped: Clopidogrel 75mg Started: Aspirin 300mg OD for 2/52 After completion of aspirin please restart clopidogrel 75mg OD long term		Simvastatin 40mg ON Lansoprazole 30mg OD (lunchtime) Citalopram 20mg OM Tafluprost T, both eyes BD Brinzolamide 1 drop BE BD Aspirin 300mg OM for 2/52 (last day 17/06/13) After completion of aspirin please restart clopidogrel 75mg OM long term	1
DISCHARGE LOUNGE (St Peter's)	Losartan 25mg OD Sertraline 50mg OD			Losartan 25mg OD Sertraline 50mg OD Amoxicillin 500mg TDS for 10days Ibuprofen 400mg TDS	1
MED SHORT STAY UNIT	Memantine 20mg OM Aspirin 75mg OM Candesartan 20mg OM Atorvastatin 20mg ON Digoxin 125mcg OM Febuxostat 80mg OM Furosemide 40mg OM Bisoprolol 1.25mg OM Folic acid 5mg OM GTN spray T PRN Movicol T BD	Candesartan reduced to 4mg .		Memantine 20mg OM Aspirin 75mg OM Candesartan 4mg OM Atorvastatin 20mg ON Digoxin 125mcg OM Febuxostat 80mg OM Furosemide 40mg OM Bisoprolol 1.25mg OM Folic acid 5mg OM GTN spray T PRN Movicol T BD	2	n
DISCHARGE LOUNGE (St Peter's)		Stopped tiotiropium and changed to glyccpyrronium 50mcg seebri breezhaler once daily .		Clopidogrel 75mg OD Aspirin 75 mg OD Diltiazem 60mg TDS Atorvastatin 80mg ON Lansoprazole 30mg ON Calcichew D3 T Od Raloxifene 60mg OD Seebri breezhaler Glyccpyrronium 50mcg T OD Seretide 500mcg T BD Prednisolone 30mg OD until 06/06/13 Amlodipine 5mg OD Salbutamol 1-2 puff QDS PRN	n/a
DISCHARGE LOUNGE (St Peter's)		withold normal diazepam untiul patient is on detox regime		Diazepam 10mg TDS 04/06/13 Diazepam 10mg 08:00, 5mg at 12:00, 10mg 22;00 05/06/13 Diazepam 5mg QDS 06/06/13 Lantus 12units ON Subulex 8mg OD Paracetamol 1g QDS Cyclizine 50mg TDS Ibuprofen 400mg TDS Pregabalin 75mg BD Levothyroxine 150mcg OD Novorappid 10-12units TDS with meals Metronidazole 400mg TDS until 09/06/13 Augmentin 625mg TDS until 09/06/13	n/a
MAY WARD	Amlodipine Furosemide Lisinopril Atorvastatin Ventolin PRN	None		As on admission: Amlodipine Furosemide Lisinopril Atorvastatin Ventolin PRN	0
DISCHARGE LOUNGE (St Peter's)	ramipril 1.25mg po od simvastatin 40mg po od aspirin 75mg po od adcal D3 T bd po strontium 2g po on fortisip T tds macrogol TT bd po senna TT po on paracetamol 1g po qds Dipyridamol MR 200 po BD Paroxetin 30mg po OD	Ramipril has been stopped		simvastatin 40mg po od aspirin 75mg po od adcal D3 T bd po strontium 2g po on fortisip T tds macrogol TT bd po senna TT po on Lactulose 10ml po BD paracetamol 1g po qds Dipyridamol MR 200 po BD Paroxetin 30mg po OD	1
MEDICAL ASSESSMENT UNIT	Nil regular	Metformin / gliclazide started		Metformin 500mg OM- increase to 500mg BD in one week if well tolerated Gliclazide 80mg OM Please also provide Ketostix	2	n
ASH WARD				Nil	n/a
MED SHORT STAY UNIT				Midazolam 10mg/5ml 2.5-5.0mg s/c 2-4 hourly PRN Please supply 10(ten) ampuoles of midazolam Glycopyyronium 0.2mg s/c 4-6 hourly PRN Morphine 10mg/1ml 2.5-5.0mg s/c 2-4 hourly PRN Please supply 10(ten ) ampuoles of morphine Levopyromazine 6.25mg s/c 2-4 hourly PRN Adcal D3 T BD Alendronic acid 70mg once weekly Omperazole 20mg OD Seretide 125 evohaler 2 puff BD Salbutamol 1-2 puff QDS , PRN Omitted…	n/a
MAPLE WARD	duloxetine furosemide throxine seretide adcal d3			Duloxetine 60mg od Furosemide 40mg od Levothyroxine 150micrograms od Seretide 250 accuhaler T bvd Adcal D3 T bd (note- px on thyroxine)	0
FALCON WARD				Co-Codamol 30/500 QDS 14days	n/a
MED SHORT STAY UNIT				Frusemide 40mg OD Fluoxetine 20mg OD Adcal D3 T OD Folic acid 5mg OD Omeprazole 20mg oD Fortijuice T BD Hypermellose 0.3% T QDS Ferrous sulphate 200mg TDS Movicol T BD Hydroxycobalamin 1mg /1ml once in 3 months Diazepam 1mg OM	n/a
FALCON WARD		nil			no
SURGICAL ASSESSMENT UNIT (DW)				Paracetamol 1g PO QDS	n/a
KINGFISHER WARD				Paracetamol 1g QDS (prn)	n/a
LABOUR WARD				Paracetamol 1g QDS Ibuprofen 400mg TDS	n/a
DICKENS				TEDS for 2weeks post op aspirin 75mg po od bisoprolol 5mg po od ramipril 2.5mg po on simvastatin 40mg po on co-codamol (30/500) TT po qds movicol T PO BD	n/a
Heron Ward	Nifedipine sr coracten 20mg PO BD Pravastatin 40mg PO ON Metformin 500mg PO BD Exetimibe 10mg PO OD Warfarin 6mg and 6.5mg alternate days - needs this for re-do bypass paracetamol 1g QDS po Ferrous Sulphate 200mg bd po for 4weeks	Added tramadol, paracetamol and NSAID. PPI started to cover Nsaid Clexane and warfarin to go home with	warfarin needed lifelong to give fem-pop bypass patency (as it is a re-do) . - Discussed with Mr Browning. warfarin 6mg od until INR check on monday 10/06/13	Nifedipine sr coracten 20mg PO BD Pravastatin 40mg PO ON Metformin 500mg PO BD Exetimibe 10mg PO OD Warfarin loading dose paracetamol 1g QDS po tramadol 50mg QDS po PRN 2/7 Ibuprofen 400mg tds po 2/7 Lansoprazole 30mg od po Clexane 100mg s/c od until INR check Monday 10/06/13	3	n
HOLLY WARD	Thyroxine 100 micrograms PO OD Simvastatin 40mg PO OD Gabapentin 300mg PO BD Omeprazole 20mg PO OD Ferrous fumerate 322mg PO BD Bumetanide 1mg PO lunch and 2mg breakfast. Ventolin 2 puffs PRN Aspirin 75mg PO OD Carbocysteine 375mg PO QDS Seretide Evohaler 250/25 2 puffs INH BD Viscotears 0.2% liquid gel both eyes PRN Paracetamol 1g QDS PRN Dipyridamole 200mg PO BD	Started folic acid 5mg PO OD for anaemia Simvastatin stopped Completed course of antibiotics Started regular - 5ml saline nebulisers QDS - 5mg salbutamol nebulisers QDS		Thyroxine 100 micrograms PO OD Simvastatin 40mg PO OD Gabapentin 300mg PO BD Omeprazole 20mg PO OD Ferrous fumerate 322mg PO BD Bumetanide 1mg PO lunch and 2mg breakfast. Ventolin 2 puffs PRN Aspirin 75mg PO OD Carbocysteine 375mg PO QDS Seretide Evohaler 250/25 2 puffs INH BD Viscotears 0.2% liquid gel both eyes PRN Paracetamol 1g QDS PRN Dipyridamole sr 200mg PO BD - 5ml saline nebulisers QDS -…	3	n
JOAN BOOKER WARD				Paracetamol 1g po qds ibuprofen 400mg po tds Metronidazole 400mg po tds for 7 days in total Co-Amoxiclav 625mg po tds for 7 days in total. lactulose 10-15mls po BD Fybogel One sachet po BD	n/a
MED SHORT STAY UNIT	Simvastatin 20mg ON Warfarin as per INR Omeprazole 20mg OD Ramipril 1.25mg OD Adcal D3 T OD Bisoprolol 3.75mg OD Furosemide 20mg OD Digoxin 125 micrograms OD	STOPPED: Digoxin	Furosemide 20mg OD	Boots Pharmacy, 58-60 Church Road, TW15 2TW. Ph:01784252080/Fax:01784421701 prepares a dosette box for the patient and delivers to her home. Simvastatin 20mg ON Warfarin as per INR (usual dose 2mg/3mg on alternate days) Omeprazole 20mg OM Ramipril 1.25mg OM Adcal D3 T OM Bisoprolol 3.75mg OM furosemide 40mg BD Spironolactone 25mg OM	2	n
LABOUR WARD		Started on Cephaclor 250mg po tds for 7 days. Reason: 3rd degree tear Started on Metronidazole 200mg po tds for 7 days . Reason: 3rd degree tear Started on Lactulose 10mls po bd for 14 days. Reason: 3rd degree tear Started on Fybogel T po bd for 14 days. Reason: 3rd degree tear		Cefaclor 250mg po tds for 7 days Metronidazole 200mg po tds for 7 days Lactulose 10mls po bd for 14 days Fybogel T po bd for 14 days	3	y
LABOUR WARD					no
LABOUR WARD					no
SAU VIRTUAL WARD	Levothyroxine 100 micrograms PO OD	No changes		Levothyroxine 100 micrograms PO OD	0
JOAN BOOKER WARD				Paracetamol 1g QDS (prn) Ibuprofen 400mg TDS (prn) Labetolol 100mg BD PO	n/a
				Total with no changes	21	0.169355
				Total with undocumented change(s)	24	0.193548	0.533333
				Total with documented change(s)	12	0.0967742	0.266667
				Total with documented change(s), and reason(s)	9	0.0725806	0.2
				Total	124	0.532258	1
				Total with changes	45
				Total can't tell if changes	42
				Used medication wizard	8
				Used med wizard and documented all changes	8
				Used med wizard and documented all changes, and reasons	6
				total on no medication	16

## Sheet: Comp figures
	May 1st	June 5th
total on no medication	7	16
Total with no changes to medication	5	21
Total with undocumented change(s)	32	24
Total with documented change(s), no reason(s)	13	12
Total with documented change(s), and reason(s)	4	9
Total unclear if any changes to medication	31	42
Total	92	124
Total with changes	49	45
Used medication wizard	0	8
Used med wizard and documented all changes	0	8
Used med wizard and documented all changes, and reasons	0	6
% used med wizard for TTOs with medication		0.0740741
% used med wizard for TTOs with changes to meds		0.177778
	May 1st, not used wizard	June 5th, used wizard	June 5th, inc those who used and did not use wizard
% with undocumented change(s)	0.653061	0	0.533333
% with documented change(s), no reason(s)	0.265306	0.25	0.266667
% with documented change(s), and reason(s)	0.0816327	0.75	0.2

## Sheet: Survey results
What level of Doctor are you?	Have you used the Medication Input Wizard when writing TTOs using Inpatient Lists?	If you have used the Medication Input Wizard, did it make any difference to the time it takes for you to enter medication on admission, medication changes, and medication on discharge?	Does using the Medication Wizard affect how you document Medication Changes?	The Medication Wizard gives warning messages and examples when prescribing Controlled Drugs, and Warfarin. Have you ever noticed these warnings?	A guide to Follow Up arrangements has been added to Inpatient Lists. Have you ever used this?	Do you believe the Follow Up guide is beneficial?	Do you believe the Medication Wizard is beneficial?	How often do you use the Medication Input Wizard when writing a TTO?	The Medication Wizard gives warning messages and examples when prescribing Controlled Drugs, and Warfarin. Do you believe such warning messages and examples are beneficial?
F1	no	No difference	No difference	No	no	no	no	Never	no
F1	Yes	Much Faster	I document more medication changes than before	No	no	Yes	Yes	Every time	Yes
F1	Yes	Much Faster	No difference	No	no	Yes	Yes	Sometimes	Yes
SHO	Yes	Much Faster	I document more medication changes than before	Yes	no	Unable to say	Yes	Every time	Yes
F1	Yes	Much Faster	I document more medication changes than before	Yes	Yes	Yes	Yes	Often	Yes
F1	Yes	Slightly faster	I document more medication changes than before	Yes	Yes	Yes	Yes	Often	Yes
F1	no			no	no	Yes	Yes	Never	Yes
F1	Yes	Much Faster	I document more medication changes than before	Yes	no	Yes	Yes	Every time	Yes
F1	Yes	Slightly faster	I document more medication changes than before	Yes	no	Unable to say	Yes	Every time	Yes
F1	Yes	Much Faster	I document more medication changes than before	no	no	Yes	Yes	Sometimes	Yes
F1	Yes	Slightly faster	I document more medication changes than before	Yes	no	Unable to say	Yes	Sometimes	Yes
SHO	no			no	Yes	No	Yes	Never	no
SHO	no			no	Yes	Yes	Yes	Never	Yes
F1	Yes	Much Faster	No difference	Yes	no	Unable to say	Yes	Often	Yes
F1	Yes	No difference	No difference	Yes	no	Unable to say	Yes	Sometimes	Yes
F1	Yes	Much Faster	I document more medication changes than before	no	no	Unable to say	Yes	Every time	Yes
F1	Yes	Slightly faster	I document more medication changes than before	Yes	no	Unable to say	Yes	Sometimes	Yes
F1	Yes	Slightly faster	I document more medication changes than before	Yes	Yes	Yes	Yes	Every time	no
	14	8	11	10	5	9	17	6	15
	4	5		8	13	2	1	5	3
		2				7		3
								4
Positive results	0.777778	0.722222	0.611111	0.555556	0.277778	0.818182	0.944444	0.777778	0.833333
						0.181818
						0.388889
